## **Obesity and longevity: The retrospective longitudinal analysis of international data**

Liapin, G. MPH (\*); Vlassov, V. MD (\*\*)

(\*), National Research University Higher School of Economics, Moscow;

gregorylyapin@gmail.com; ORCID 0000-0003-2662-0200

(\*\*), National Research University Higher School of Economics, Moscow; vvlassov@hse.ru;

ORCID 0000-0001-5203-549X

### **Key words**

Obesity; length of life; ecological study; international comparisons; developing countries

Word count: 2569 words, excluding web-only Appendix

### **Endnotes**

Contribution: GL did the analysis and drafted the report; VV generated the idea, supervised the analysis and drafted the report.

Competing interests: Authors declare that they have no competing interests

Supplementary information: The supplementary information is available for this article

Correspondence and requests for materials should be addressed to VV.

### **Acknowledgments**

We appreciate the support by Semyon Sorokin in calculations and Kristina Rainich for comments on the early draft of the article.

## Abstract

**Objectives.** Due to the economic growth at the end of the 20th century people in low-income countries live longer, but still spend on food most of their income, and suffer from the low food quality. These countries, as well as affluent countries demonstrate rising prevalence of obesity, which is a risk factor for bad health and increased mortality. The interplay of longevity and obesity at different levels of economic development is not clear.

**Design.** We used World Bank, International Monetary Fund, and Global Burden of Disease project data on population size, longevity, prevalence of obesity, and income as Gross domestic product per capita adjusted to purchasing power in international dollars.

**Results.** After we stratified countries by income, we found that there is a long-term increase in life expectancy with an increase in the prevalence of obesity in countries of all income levels. There is a higher prevalence of obesity in poor countries than in the affluent countries at the equal life expectancy.

**Conclusions.** The economic growth in all countries lead to increase in length of life and is associated with the increase of obesity prevalence. In poor countries the access to food and the food quality is limited as well as customs of consumption are different. It leads to the higher prevalence of overweight and obesity at similar level of length of life. It may be the cause of the slower progress in life expectancy.

## Background

The economic growth at the end of the 20th century made possible deep changes in the consumption of goods and the progress in public health all over the world. People in low-income countries still suffer from hunger, malnutrition and die early, but they live longer life and have more food (1,2). People there fare better, but still spend on food most of their income, and suffer from the low food quality. As a result these countries demonstrates decreasing prevalence of stunting and rising prevalence of obesity (3). In more affluent countries the share of spending on nutrition decreases and shifts towards the consumption of higher quality diverse foods, to savings, travel etc., but the net food consumption is higher (4).

Overweight and obesity appear one of the faces of globalization and urbanization (5,6). Obesity prevalence has doubled since 1980 in more than 70 countries, with a significant growth in other countries (7). Conditions associated with obesity include hypertension, type 2 diabetes, cardiovascular disease, lung disease, and cancer (8,9). It has been shown that obesity has a significant negative impact on life expectancy: severe obesity may be associated with the reduction of life expectancy by 5-20 years (10,11).

The purpose of this study was to analyze the historical connection between the increasing prevalence of obesity and the increase in life expectancy in countries of different income levels.

## Methods

We used data on life expectancy at birth (LEB) and population size from World Bank database (12,13). We used the obesity prevalence data from Global Burden of Disease Project (14) as an age-adjusted prevalence for both sexes, adults (20+ years old). We used the International Monetary Fund Data on GDP purchasing power adjusted in international dollars per capita (GDP PC) (15). All these data were available for 119 countries, listed in the Appendix.

To sort out the effect of the income on the LEB we grouped countries by the GDP PC. We used the average LEB and obesity prevalence in the economically similar groups of countries to smooth the periodic effects of conflicts, crises, and other disasters. We grouped countries by the GDP PC in 1997 into quintiles. Some countries during the study period – 1980-2015 changed their ranking by the GDP PC. To reduce the possible effect of the transition of countries from one quintile of GDP PC to another (e.g. China had moved from lowest quintile to middle of the range), we repeated analysis grouping countries by GDP PC in 1990, 1997, 2005, and 2013. We selected these years to reduce the influence of major world economic fluctuations on the country ranking.

For each group of countries by GDP PC we calculated the weighted average LEB and obesity prevalence for every year. The population size is the weighting factor. Thus, for the

group of two countries the weighted average of the prevalence of obesity in the year Y is  $(pr1Y \cdot pop1Y + pr2Y \cdot pop2Y) / (pop1Y + pop2Y)$ , where pr1 and pr2 are prevalences in these countries, and the pop1 and pop2 are populations in these countries.

For calculations and plotting, we employ Python, libraries pandas and numpy.

This study does not need the approval from ethics review board, because we use publicly available national level data.

## Results

In all five groups by GDP PC there is a strong increase of life expectancy at birth and the prevalence of obesity during period 1980-2015. Fig. 1 presents the results for the case of grouping countries by GDP PC in 1997. When we group countries by GDP PC at the different predetermined time points, we produced similar curves with some irregularities in order of life expectancy curves (see Appendix). Tracks for countries of two upper quintiles of GDP PC are more linear, because the development of member countries was not disturbed by the major natural or social disasters during the study period. Please compare fig. 2, Israel and Argentina as an example.

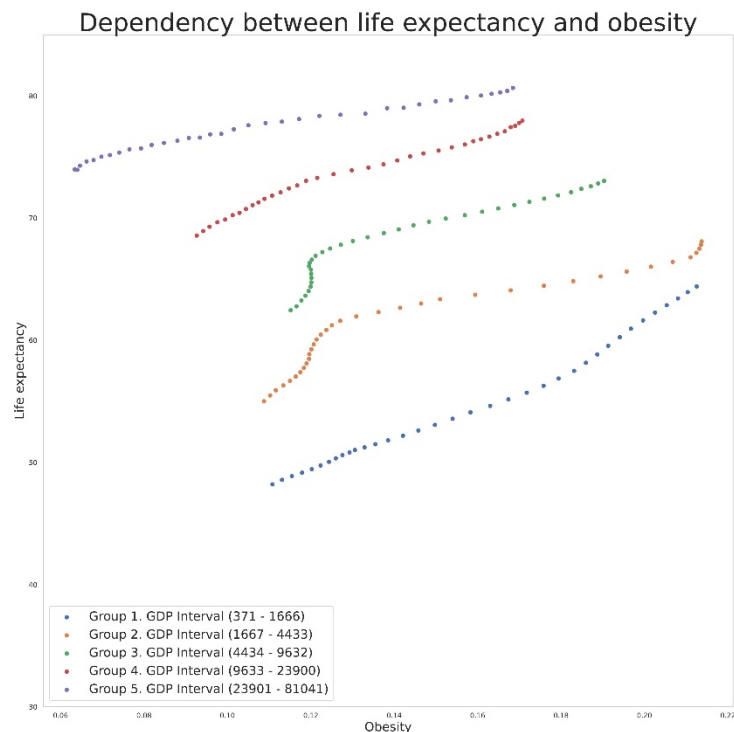

Figure 1. The relationship between LEB and the prevalence of obesity, countries grouped by GDP PC in 1997. Ordinate: LEB, years. Abscissa: Obesity prevalence, %

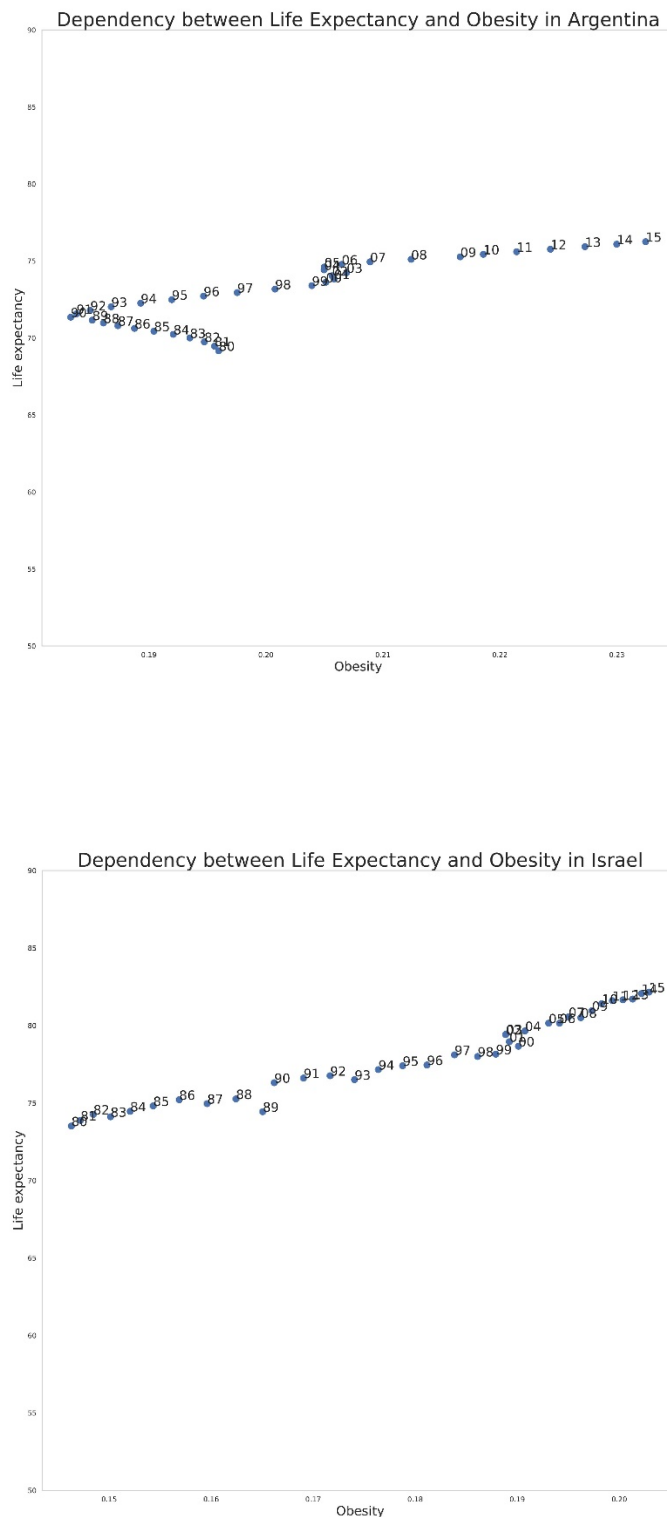

Figure 2. The relationship between the prevalence of obesity (abscissa, %) and LEB in Argentina (a), and Israel (b). Ordinate: LEB, years.

We constructed double charts to examine the additional relations between the three variables (fig. 3). Middle left portion of the chart is similar to the chart at the fig.1. Middle bottom chart is a Preston curve (16). On the logarithmic scale this curve is effectively

straightened. Normally the Preston curve is modelled on the surface of scatterplot of the cross-sectional data. Here we see that the average longitudinal data form the same curve.

On the fig.2, as well as on the fig. 1, less affluent countries have lower life expectancy and higher prevalence of obesity. The overlap of national data points is significant by the direct comparison, especially of the obesity prevalence data. It is better visible on overlapping histograms of national data points in the five groups. When countries are stratified by GDP PC and pictured longitudinally, the differences are striking.

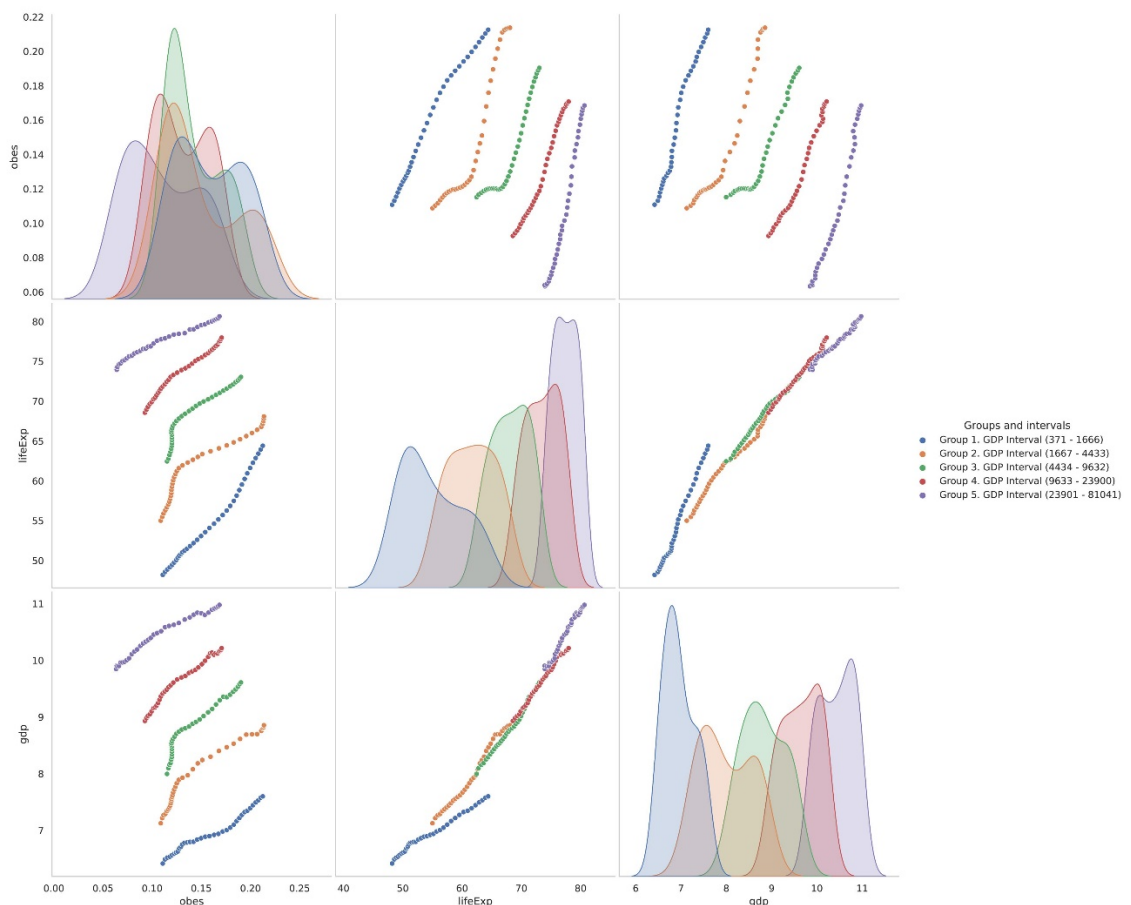

Figure 3: Double chart, grouping of countries by GDP PC 1997. Abscissa: obesity prevalence, %; LEB, years; GDP PC. Ordinate: GDP PC; LEB, years; obesity prevalence (bottom to up). Note log scale for GDP PC

### Discussion

The main finding of our analysis is that in the all range of countries – from poor to rich – there is a strong historical increase of LEB with growing obesity prevalence. During 35 years of the period of study, the gap between the poor and rich countries had reduced due to faster increase of LEB in poor countries, but the size of the reduction is not appealing. While LEB of poor countries improves, at the similar LEB level the prevalence of obesity is higher in poor countries.

Most research of the influence of overweight and obesity on the longevity are cohort studies on the individual subject level. Our study belongs to the smaller set of research – ecological studies, looking for the differences between populations. Our study compares countries in time. The improvements of the economy and better nutrition necessary should lead to the LEB increase and, in the same time, increase of the obesity prevalence. These very natural parallel changes appear as questioning harms of the obesity. We believe that the explanation is straightforward: socioeconomic development brings so many positive changes to the human life, including better nutrition, housing, education and health care, that it is quite natural that negative impact of the overweight and obesity is negligible comparing to them (17).

Economic growth not just brings the food, but first make accessible the food with cheap calories for the people who never had dreamed about the selection of healthy products. It is the major source of the high and increasing obesity prevalence in developing countries (3,18,19). The low quality of food increasingly available in the poor countries at early stages of the socioeconomic growth may be the explanation of the slow increase of LEB – while the obesity prevalence grows up to 22% (lower curve, fig. 1). Later on, when quality of food and quality of life in general are improving, the growth of longevity became faster. Another force shaping the LEB-obesity curve for the poor countries is the prevalent stunting, leading to the higher body-mass index later in life thus biasing up the estimate of obesity prevalence (20).

In the light of our ecological study it appears, that addressing the high obesity prevalence in the developing countries may be not the primary objective of the public health interventions. The relationships of poor people with the food are very different from the nutritional habits of the people who live in the societies of plenty. Suppression of the excessive calories consumption is rarely possible in poor societies. Only after decades of the good access to the food and appearance of the feeling of safety, the arguments for the healthy food and other possibilities brought by the economic development may be heard and be effective. Imposition of the ideals of the lean body onto the people who in the first family generation have enough food for the day is unreasonable, at least.

Tracks for countries of the two upper quintiles of GDP PC (fig.1) are very similar. The increase of LEB with changes of obesity prevalence is minimal in these groups. It is the probable symptom of the smaller role of nutritional factors in the longevity in the affluent societies. On the other side, in the developed countries the increase of the prevalence of obesity may be a cause of the slow longevity improvement(21,22) and it had been hypothesized that it may be the cause of the future longevity decline (10).

Comparison of the separate countries was not the objective of this study, but examples, offered in fig. 2 are an illustration. The long economic crisis of 1980s in Argentina is reflected in

the loop of reduced obesity while slow rise of LEB. The world economic crisis of 1998 led to the depression in Argentina, reflected in the similar, but smaller loop. Another example is Israel, where we can see the short period of reduction of the LEB, which appears the consequence of the economic recession in 1981-1988.

Our study is limited by the nature of data. Many poor countries do not have effective vital registration systems and the estimates of the obesity prevalence are inaccurate or impossible. As a result, the poor countries are underrepresented in our set of countries. In countries included in the study the obesity prevalence data and to a lesser degree longevity data are produced by the relevant organizations using different types of statistical adjustments of field/vital registration data and interpolations. It may lead to the reduction of the random and short-term variations in the individual country data, but may not distort on a large scale the effect we describe.

## Conclusion

During the period 1980-2015 the increase of the longevity at the national level was associated with increase in the prevalence of obesity all around the world. The levels of the past longevity of the affluent countries are attained by low-income countries when they have the higher prevalence of obesity. At the moment the higher longevity is a great achievement, but in future the high prevalence of obesity may be a problem for the developing countries.

## References

1. Webb P, Stordalen GA, Singh S, Wijesinha-Bettoni R, Shetty P, Lartey A. Hunger and malnutrition in the 21st century. *BMJ*. 2018 Jun;361:k2238.
2. Kinyoki DK, Osgood-Zimmerman AE, Pickering B V., Schaeffer LE, Marczak LB, Lazzar-Atwood A, et al. Mapping child growth failure across low- and middle-income countries. *Nature*. 2020 Jan;577(7789):231–4.
3. Popkin BM, Adair LS, Ng SW. Global nutrition transition and the pandemic of obesity in developing countries. *Nutr Rev*. 2012 Jan;70(1):3–21.
4. Pope R. Engel's Law. *BYU Stud Q*. 2012 Jun;51(3):119–40.
5. Tobergte DR, Curtis S. Global report on urban health: equitable, healthier cities for sustainable development. *J Chem Inf Model*. 2013;53:1689–99.
6. Yusuf S, Reddy S, Ôunpuu S, Anand S. Global Burden of Cardiovascular Diseases. *Circulation*. 2001 Nov;104(22):2746–53.
7. Collaborators TG 2015 O. Health Effects of Overweight and Obesity in 195 Countries over 25 Years. *N Engl J Med*. 2017 Jul;377(1):13–27.
8. Villareal DT, Apovian CM, Kushner RF, Klein S. Obesity in older adults: Technical review and position statement of the American Society for Nutrition and NAASO, the Obesity Society. *Obes Res*. 2005 Nov;13(11):1849–63.
9. Adams KF, Schatzkin A, Harris TB, Kipnis V, Mouw T, Ballard-Barbash R, et al.



- Overweight, Obesity, and Mortality in a Large Prospective Cohort of Persons 50 to 71 Years Old. *N Engl J Med*. 2006 Aug;355(8):763–78.
10. Olshansky SJ, Passaro DJ, Hershow RC, Layden J, Carnes BA, Brody J, et al. A Potential Decline in Life Expectancy in the United States in the 21st Century. *N Engl J Med*. 2005 Mar;352(11):1138–45.
  11. Fontaine KR, Redden DT, Wang C, Westfall AO, Allison DB. Years of Life Lost Due to Obesity. *JAMA*. 2003 Jan;289(2):187.
  12. World Bank. Life expectancy at birth, total (years) | Data. World Population Prospects: 2017 Revision. 2017.
  13. World Bank Data. Population, total | Data [Internet]. Available from: <https://data.worldbank.org/indicator/SP.POP.TOTL>
  14. Global Burden of Disease. Global Burden of Disease Study 2015 (GBD 2015) Obesity and Overweight Prevalence 1980-2015 | GHDx. Institute for Health Metrics and Evaluation (IHME). 2017.
  15. International Monetary Fund. World Economic Outlook (October 2019) - GDP per capita, current prices [Internet]. International Monetary Fund. 2020. Available from: <https://www.imf.org/external/datamapper/NGDPDPC@WEO/OEMDC/ADVEC/WEOWORLD>
  16. Preston SH. The changing relation between mortality and level of economic development. 1975. *Bull World Health Organ*. 2003;81(11):833–41.
  17. Flegal KM, Graubard BI, Williamson DF, Gail MH. Excess Deaths Associated With Underweight, Overweight, and Obesity. *JAMA*. 2005 Apr;293(15):1861.
  18. Ettarh R, Van de Vijver S, Oti S, Kyobutungi C. Overweight, obesity, and perception of body image among slum residents in nairobi, Kenya, 2008-2009. *Prev Chronic Dis*. 2013 Dec;10(12):1–9.
  19. Holdsworth M, Gartner A, Landais E, Maire B, Delpuech F. Perceptions of healthy and desirable body size in urban Senegalese women. *Int J Obes*. 2004;28(12):1561–8.
  20. Kassebaum N, Kyu HH, Zoenckler L, Olsen HE, Thomas K, Pinho C, et al. Child and adolescent health from 1990 to 2015: Findings from the global burden of diseases, injuries, and risk factors 2015 study. *JAMA Pediatr*. 2017 Jun;171(6):573–92.
  21. Preston SH, Vierboom YC, Stokes A. The role of obesity in exceptionally slow US mortality improvement. *Proc Natl Acad Sci U S A*. 2018;115(5):957–61.
  22. Masters RK, Reither EN, Powers DA, Yang YC, Burger AE, Link BG. The impact of obesity on US mortality levels: The importance of age and cohort factors in population estimates. *Am J Public Health*. 2013;103(10):1895–901.

## Web only data

### 1. Countries included in the study.

Albania  
Algeria  
Angola  
Antigua and Barbuda  
Argentina  
Australia  
Austria  
Bahrain  
Bangladesh  
Barbados  
Belgium  
Belize  
Benin  
Bhutan  
Bolivia  
Botswana  
Brazil  
Bulgaria  
Burkina Faso  
Burundi  
Cameroon  
Canada  
Central African Republic  
Chad  
Chile  
Colombia  
Comoros  
Costa Rica  
Cyprus  
Denmark  
Dominican Republic  
Ecuador  
El Salvador  
Equatorial Guinea  
Ethiopia  
Fiji  
Finland  
France  
Gabon  
Germany  
Ghana  
Greece  
Grenada  
Guatemala  
Guinea-Bissau  
Guyana  
Haiti  
Honduras  
Hungary  
Iceland

India  
Indonesia  
Ireland  
Israel  
Italy  
Jamaica  
Japan  
Jordan  
Kenya  
Kiribati  
Kuwait  
Lebanon  
Lesotho  
Libya  
Luxembourg  
Madagascar  
Malawi  
Malaysia  
Maldives  
Mali  
Malta  
Mauritius  
Mexico  
Morocco  
Mozambique  
Nepal  
Netherlands  
New Zealand  
Niger  
Norway  
Oman  
Pakistan  
Panama  
Papua New Guinea  
Paraguay  
Peru  
Philippines  
Poland  
Portugal  
Puerto Rico  
Qatar  
Romania  
Rwanda  
Saudi Arabia  
Senegal  
Seychelles  
Sierra Leone  
Singapore  
Solomon Islands  
Spain  
Sri Lanka  
Sudan

Sweden  
Switzerland  
Tanzania  
Thailand  
Togo  
Tonga  
Trinidad and Tobago  
Tunisia  
Turkey  
Uganda  
United Arab Emirates  
United Kingdom  
United States  
Uruguay  
Vanuatu  
Vietnam  
Zambia

2. Dependence of life expectancy and prevalence of obesity. Countries are grouped by per capita GDP in 1990, 2005, 2013.

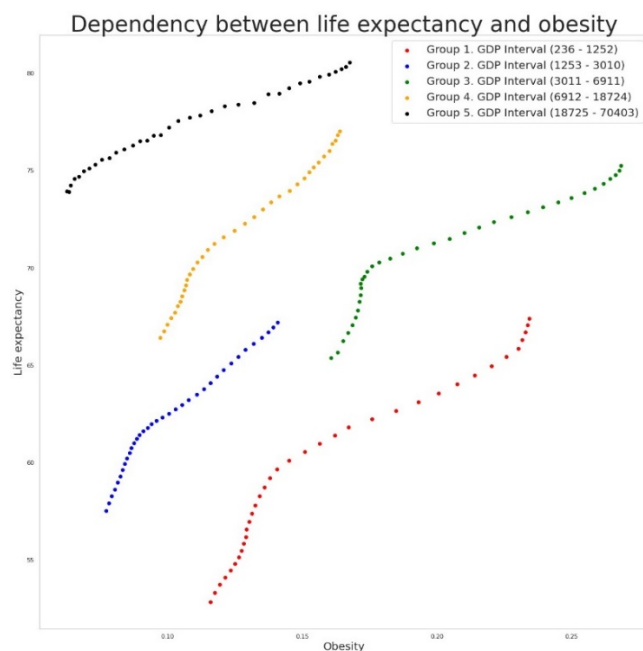

*The relationship between LEB and prevalence of obesity, countries grouped by GDP PC 1990. Ordinate: LEB, years. Abscissa: Obesity prevalence, %.*

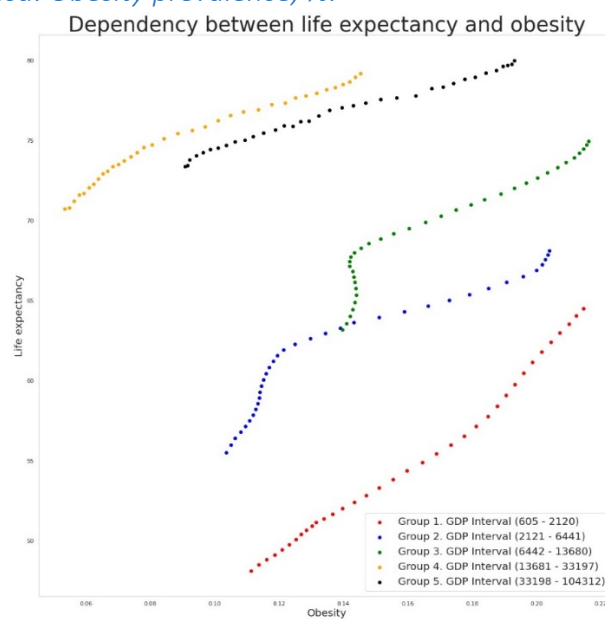

*The relationship between LEB and prevalence of obesity, countries grouped by GDP PC 2005. Ordinate: LEB, years. Abscissa: Obesity prevalence, %.*

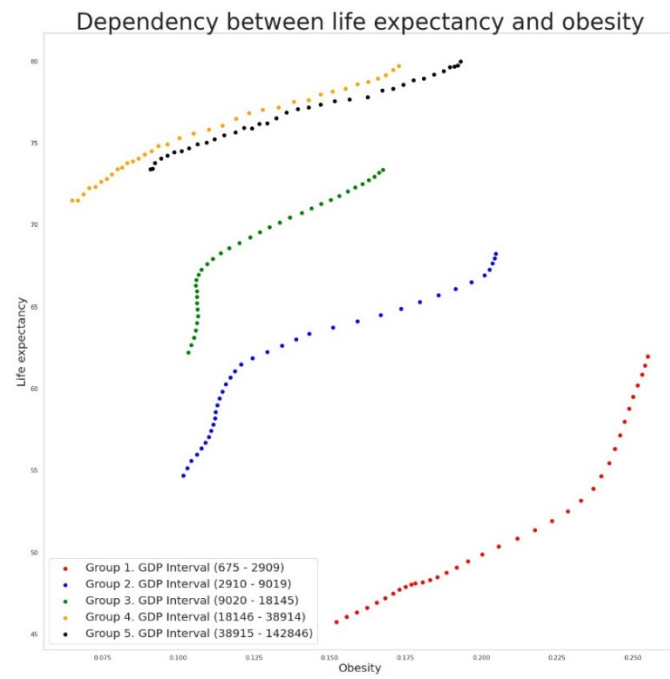

*The relationship between LEB and prevalence of obesity, countries grouped by GDP PC 2013.  
Ordinate: LEB, years. Abscissa: Obesity prevalence, %.*
